# Supplementary material for: Energetic Contributions to Channel Gating of Residues in the Muscle Nicotinic Receptor β1 Subunit
Source: PLoS One. 2013 Oct 23;8(10):e78539. doi: 10.1371/journal.pone.0078539 (PMC3806828; doi:10.1371/journal.pone.0078539)
Supplement: Table S3 — Measured rates. (DOCX) [file pone.0078539.s003.docx]

Table S3. Measured rates.

| R | Pos | M | ko ± SEM (N) | kc ± SEM (N) | ko / kc |
| --- | --- | --- | --- | --- | --- |
| WT |  |  | 44 ± 5 (6) | 2455 ± 174 (5) | 0.018 |
| K | 46 | M | 23 ± 6 (3) | 2211 ± 300 (3) | 0.011 |
| K | 46 | Q | 22 ± 7 (3) | 1860 ± 248 (3) | 0.012 |
| K | 46 | R | 23 ± 3 (3) | 967 ± 94 (3) | 0.024 |
| Y | 55 | F | 42 ± 6 (4) | 1834 ± 418 (3) | 0.023 |
| Y | 55 | Q | 33 ± 7 (4) | 2024 ± 141 (4) | 0.016 |
| Y | 55 | S | 45 ± 7 (3) | 1858 ± 302 (3) | 0.024 |
| L | 93 | A | 37 ± 5 (5) | 1485 ± 122 (3) | 0.025 |
| L | 93 | T | 66 ± 10 (3) | 1738 ± 93 (3) | 0.038 |
| L | 93 | Y | 57 ± 17 (3) | 1412 ± 180 (4) | 0.040 |
| N | 96 | S | NE | NE | NE |
| N | 96 | V | 44 ± 4 (3) | 1015 ± 110 (3) | 0.043 |
| N | 96 | W | 36 ± 6 (3) | 1621 ± 70 (3) | 0.022 |
| V | 132 | A | 41 ± 7 (3) | 2905 ± 532 (3) | 0.014 |
| V | 132 | L | 37 ± 2 (3) | 712 ± 93 (5) | 0.052 |
| V | 132 | Q | 48 ± 10 (3) | 2562 ± 325 (3) | 0.019 |
| Y | 149 | A | 25 ± 3 (7) | 1869 ± 291 (3) | 0.013 |
| Y | 149 | D | 39 ± 5 (3) | 1757 ± 152 (3) | 0.022 |
| Y | 149 | Q | 48 ± 14 (3) | 1588 ± 177 (4) | 0.030 |
| Y | 149 | S | 45 ± 12 (3) | 1892 ± 233 (4) | 0.024 |
| N | 182 | D | 58 ± 13 (3) | 2406 ± 53 (3) | 0.024 |
| N | 182 | E | 51 ± 6 (3) | 2084 ± 157 (3) | 0.024 |
| N | 182 | S | 52 ± 10 (3) | 3689 ± 292 (3) | 0.014 |
| G | 183 | F | 58 ± 4 (3) | 2947 ± 180 (3) | 0.020 |
| G | 183 | W | 28 ± 3 (4) | 3559 ± 261 (3) | 0.008 |
| G | 183 | Y | 40 ± 1 (3) | 3310 ± 234 (3) | 0.012 |
| Q | 184 | T | 30 ± 4 (4) | 1171 ± 122 (4) | 0.025 |
| Q | 184 | W | 38 ± 5 (3) | 2930 ± 178 (3) | 0.013 |
| I | 218 | T | 28 ± 5 (3) | 2396 ± 266 (3) | 0.012 |
| I | 218 | V | 32 ± (1) | 1793 ± 215 (3) | 0.018 |
| R | 219 | I | 51 ± 12 (3) | 869 ± 29 (3) | 0.058 |
| R | 219 | K | 33 ± 7 (3) | 4660 ± 752 (5) | 0.007 |
| R | 219 | Q | 68 ± 12 (4) | 1041 ± 79 (3) | 0.065 |
| R | 220 | I | NE | NE | NE |
| R | 220 | K | 34 ± 3 (3) | 1879 ± 396 (3) | 0.018 |
| R | 220 | Q | 45 ± 5 (4) | 2440 ± 593 (3) | 0.018 |
| K | 221 | I | 34 ± 5 (3) | 1648 ± 434 (3) | 0.021 |
| K | 221 | Q | 44 ± 5 (4) | 2615 ± 223 (4) | 0.017 |
| K | 221 | R | 66 ± 15 (3) | 1581 ± 334 (4) | 0.042 |
| S | 257 | C | 34 ± 3 (3) | 1088 ± 79 (3) | 0.031 |
| S | 257 | G | 33 ± 2 (4) | 3258 ± 209 (3) | 0.010 |
| S | 257 | I | 26 ± 3 (3) | 1128 ± 91 (3) | 0.023 |
| A | 260 | C | 26 ± 3 (3) | 1382 ± 288 (3) | 0.019 |
| A | 260 | G | 37 ± 7 (3) | 1441 ± 18 (3) | 0.026 |
| A | 260 | V | 36 ± 6 (3) | 514 ± 44 (3) | 0.069 |
| T | 265 | P | 60 ± 2 (2) | 717 ± 64 (4) | 0.083 |
| T | 265 | S | 128 ± 13 (3) | 1473 ± 158 (3) | 0.087 |
| T | 265 | Y | 81 ± 3 (3) | 2002 ± 220 (4) | 0.040 |
| V | 266 | A | 221 ± 27 (3) | 506 ± 84 (3) | 0.437 |
| V | 266 | F | 51 ± 6 (3) | 1257 ± 145 (5) | 0.041 |
| V | 266 | T | 177 ± 54 (3) | 325 ± 66 (3) | 0.545 |
| L | 270 | A | 144 ± 16 (3) | 564 ± 105 (3) | 0.255 |
| L | 270 | T | 79 ± 9 (3) | 235 ± 52 (4) | 0.335 |
| L | 270 | Y | 650 ± 152 (3) | 312 ± 54 (3) | 2.083 |
| V | 275 | A | 103 ± 16 (3) | 3352 ± 331 (5) | 0.031 |
| V | 275 | L | 66 ± 6 (4) | 520 ± 72 (3) | 0.127 |
| V | 275 | M | 122 ± 28 (3) | 909 ± 18 (3) | 0.135 |
| P | 276 | G | 48 ± 13 (3) | 1073 ± 43 (3) | 0.045 |
| P | 276 | K | 28 ± 4 (3) | 674 ± 77 (4) | 0.041 |
| P | 276 | T | 95 ± 19 (3) | 628 ± 17 (4) | 0.151 |
| L | 280 | A | 33 ± 3 (3) | 1187 ± 56 (3) | 0.028 |
| L | 280 | T | 45 ± 6 (3) | 1596 ± 103 (4) | 0.028 |
| L | 280 | Y | 34 ± 4 (3) | 813 ± 231 (3) | 0.042 |
| A | 281 | F | 50 ± 9 (3) | 1286 ± 61 (3) | 0.039 |
| A | 281 | T | 35 ± 4 (3) | 1650 ± 145 (4) | 0.021 |
| A | 281 | W | 51 ± 9 (3) | 1510 ± 110 (3) | 0.034 |
| V | 282 | A | 42 ± 7 (3) | 2387 ± 228 (5) | 0.018 |
| V | 282 | L | 55 ± 6 (3) | 998 ± 123 (4) | 0.055 |
| V | 282 | Q | 31 ± 2 (3) | 3195 ± 332 (4) | 0.010 |
| P | 283 | A | 36 ± 6 (3) | 717 ± 133 (4) | 0.050 |
| P | 283 | G | 63 ± 10 (4) | 1251 ± 58 (3) | 0.050 |
| P | 283 | S | 37 ± 6 (4) | 2106 ± 232 (3) | 0.017 |
| I | 284 | F | 38 ± 9 (3) | 1734 ± 252 (3) | 0.022 |
| I | 284 | L | 61 ± 6 (3) | 1445 ± 79 (3) | 0.042 |
| I | 284 | T | 80 ± 15 (4) | 1193 ± 31 (3) | 0.067 |
| I | 285 | F | 38 ± 7 (3) | 1107 ± 61 (3) | 0.035 |
| I | 285 | L | 33 ± 5 (3) | 782 ± 20 (3) | 0.043 |
| I | 285 | T | 71 ± 11 (3) | 348 ± 75 (3) | 0.205 |
| I | 286 | F | 97 ± 2 (3) | 1177 ± 103 (4) | 0.082 |
| I | 286 | L | 41 ± 6 (4) | 3321 ± 118 (3) | 0.012 |
| I | 286 | T | 41 ± 5 (4) | 2880 ± 490 (3) | 0.014 |

Table S3. Measured rates. The first column identifies the wild-type residue, the second its position in the mature subunit, and the third the mutation made. The next columns give the apparent opening rate (ko), apparent closing rate (kc) and the ratio of the opening to closing rates. Rates are given in 1/sec, and the number of patches analyzed is N. NE: no channel openings recorded.
